# Supplementary material
Source: PubMed Central journal article supplement (PMC3370726)
Supplement: supp_56.6.2908_SuppMaterial1.pdf [file supp_56.6.2908_SuppMaterial1.pdf]

1 **Supporting information**

2 **Table S1: Primers used in this study.**

| <b>Primer</b> | <b>Amplified locus</b> | <b>Sequence (5'-3')<sup>a</sup></b> |
|---------------|------------------------|-------------------------------------|
| pheS -F       | <i>pheS</i>            | CAYCCNGCHCGYGAYATGC                 |
| pheS -R       | <i>pheS</i>            | CCWARVCCRAARGCAAARCC                |
| rpoA-F        | <i>rpoA</i>            | ATGATYGARTTTGAAAAACC                |
| rpoA-R        | <i>rpoA</i>            | ACHGTRTTRATDCCDGCRCG                |
| atpA-F        | <i>atpA</i>            | TAYRTYGGKGAYGGDATYGC                |
| atpA-R        | <i>atpA</i>            | CCRCGRTHARYTTHGCVTG                 |
| bcaT-F        | <i>bcaT</i>            | TTTKSHRTGCCDGTWGG                   |
| bcaT-R        | <i>bcaT</i>            | GGWCCHACTTCYGYTTC                   |
| pepN-F        | <i>pepN</i>            | ATKTCTTAYGCWGAYRTYGT                |
| pepN-R        | <i>pepN</i>            | TTKCTTCAAGSMAWGSCC                  |
| pepX-F        | <i>pepX</i>            | TTTGGGTTGAAAGTCCAGT                 |
| pepX-R        | <i>pepX</i>            | CCAAGAAGAAATCCAGC                   |
| SSU-F         | 16S rRNA               | GCGGCGTGCCTAATACATGC                |
| SSU-R         | 16S rRNA               | ATCTACGCATTTACCGCTAC                |
| malE-F        | <i>malE</i>            | TGGAAAAAAGTTGCTCTTGG                |
| malE-R        | <i>malE</i>            | GTCATATTGTGAAGCAGGAG                |
| malF-F        | <i>malF</i>            | TTCTTTACCACCTGAAGCCA                |
| malF-R        | <i>malF</i>            | GCCCTCCTAAATGCATTAG                 |
| malG-F        | <i>malG</i>            | CTCTAACATTCCGTTACCTT                |
| malG-R        | <i>malG</i>            | GCTGTGATTCCATTGACGTA                |
| pip-F         | <i>pip</i>             | AAATGACTCTTGCTTCCGA                 |
| pip-R         | <i>pip</i>             | TACATGGAAGTTGTTGCCC                 |
| arb-F         | <i>arb</i>             | GTTAAATCTTCACCGTTGCT                |
| arb-R         | <i>arb</i>             | ACTGCAGCTAATCAATGTGA                |
| ycrB-F        | <i>ycrB</i>            | TTCTTTTTCTGGTTCTGCCC                |
| ycrB-R        | <i>ycrB</i>            | GCCTGTCGCTATTATCCTAC                |
| dsxB-F        | <i>dsxB</i>            | TAAATTCACGTTTCGCACCA                |
| dsxB-R        | <i>dsxB</i>            | AGAAAAAATAGACAGCCCAGC               |
| kinF-F        | <i>kinF</i>            | TGCTATCCACACGAATTCTAAC              |
| kinF-R        | <i>kinF</i>            | TGTTGCTTTAGCCGTGATT                 |
| llrF-F        | <i>llrF</i>            | CTGTCATAACCCCAAATCCG                |
| llrF-R        | <i>llrF</i>            | AGGTTTATGATGGAGTTGAAGG              |
| rliA-F        | <i>rliA</i>            | TTGCACTTGCCCTAATTG                  |
| rliA-R        | <i>rliA</i>            | CGGTCAGTCGGGTCATTA                  |
| mapA-F        | <i>mapA</i>            | TGTGGTAAAAATGGGGCAAA                |
| mapA-R        | <i>mapA</i>            | ATTGAAAAAGAAGACCGTCG                |

|           |                |                                                      |
|-----------|----------------|------------------------------------------------------|
| agl-F     | <i>agl</i>     | CGATATTCCCAGGCTGAC                                   |
| agl-R     | <i>agl</i>     | CTACGTGAATTGGGGATTG                                  |
| amyY-F    | <i>amyY</i>    | GTGCTGTAAGCTGGAATTG                                  |
| amyY-R    | <i>amyY</i>    | CAGTAAAAAAGCGGCTG                                    |
| maa-F     | <i>maa</i>     | CGTTCTCTTTTCTTCCCAG                                  |
| maa-R     | <i>maa</i>     | AGAATGGTTGCTGGCGAA                                   |
| dexA-F    | <i>dexA</i>    | CTATTCCACTTCGCAAGCA                                  |
| dexA-R    | <i>dexA</i>    | ATTGGTGGCAAAAACAGTC                                  |
| dexC-F    | <i>dexC</i>    | GCTTTCAAAGATCCACGTT                                  |
| dexC-R    | <i>dexC</i>    | GCAATTTATCATCGTCCTGAG                                |
| yreA-F    | <i>yreA</i>    | AATCTTCCGAAAACAACGAG                                 |
| yreA-R    | <i>yreA</i>    | CCAGAAATTTGAACCCCTTC                                 |
| yreB-F    | <i>yreB</i>    | AATAAAGGGTCAGTGGGAAC                                 |
| yreB-R    | <i>yreB</i>    | GGTTTCTACGGGGCTTAAAT                                 |
| yreC-F    | <i>yreC</i>    | AGGCTGACGAGATTGAAG                                   |
| yreC-R    | <i>yreC</i>    | CCCACTTTTGTACGTCTTTT                                 |
| yreD-F    | <i>yreD</i>    | CCAGACGATGTGTCCAAAAA                                 |
| yreD-R    | <i>yreD</i>    | TCGTTGGATTGGTTTTTGGG                                 |
| hyp-F     | <i>hyp</i>     | CCACGTTGACCTCTTTCA                                   |
| hyp-R     | <i>hyp</i>     | ATGGTCAAAAAAGCGAGTGA                                 |
| yreE-F    | <i>yreE</i>    | AATTTACCCGCTCGTACT                                   |
| yreE-R    | <i>yreE</i>    | ATCTAAAGAAGCGGCACAG                                  |
| tra981I-F | <i>tra981I</i> | AGGCTTCGATGTACCAGA                                   |
| tra981I-R | <i>tra981I</i> | GGCTCAAACCATACAAACTT                                 |
| yrdA-F    | <i>yrdA</i>    | TCACTTCTTTTCTCGGCCGA                                 |
| yrdA-R    | <i>yrdA</i>    | CGCTTTCTATCATTCTGGTC                                 |
| yrdB-F    | <i>yrdB</i>    | AAACCCTTATCTCGTCACTAC                                |
| yrdB-R    | <i>yrdB</i>    | ATTCTGTACCATCTTCCGTT                                 |
| malEFG-F  | <i>malEFG</i>  | GGAACACATCATGAAATCATGG                               |
| malEFG-R  | <i>malEFG</i>  | AGAAGAGATAAAAAGCATGCCG                               |
| malE-R2   | <i>malE</i>    | TCTGAACATATAACTTTGTCCTCCTCTATTATTTTAGTTGCTTTAGAGATAG |
| malFG-F2  | <i>malFG</i>   | CTATCTCTAAAGCAACTAAATAATAGAGGAGGACAAAGTTATATGTTTCAGA |

- 1 <sup>a</sup>Y, R, H, D, K, Y, W, M, and N are degenerate nucleotides: R for A or G; M for A or C; Y for C or T;
- 2 K for G or T; W for A or T; N for A, G, C or T; S for G or C; H for A, C or T; and D for A or G or T.
- 3 Inserted restriction sites are indicated by underlined sequence.
